# Supplementary material for: Cyanobacterial diversity held in microbial biological resource centers as a biotechnological asset: the case study of the newly established LEGE culture collection
Source: PubMed Central journal article supplement (PMC5982461; doi:10.1007/s10811-017-1369-y), 2018-01-06

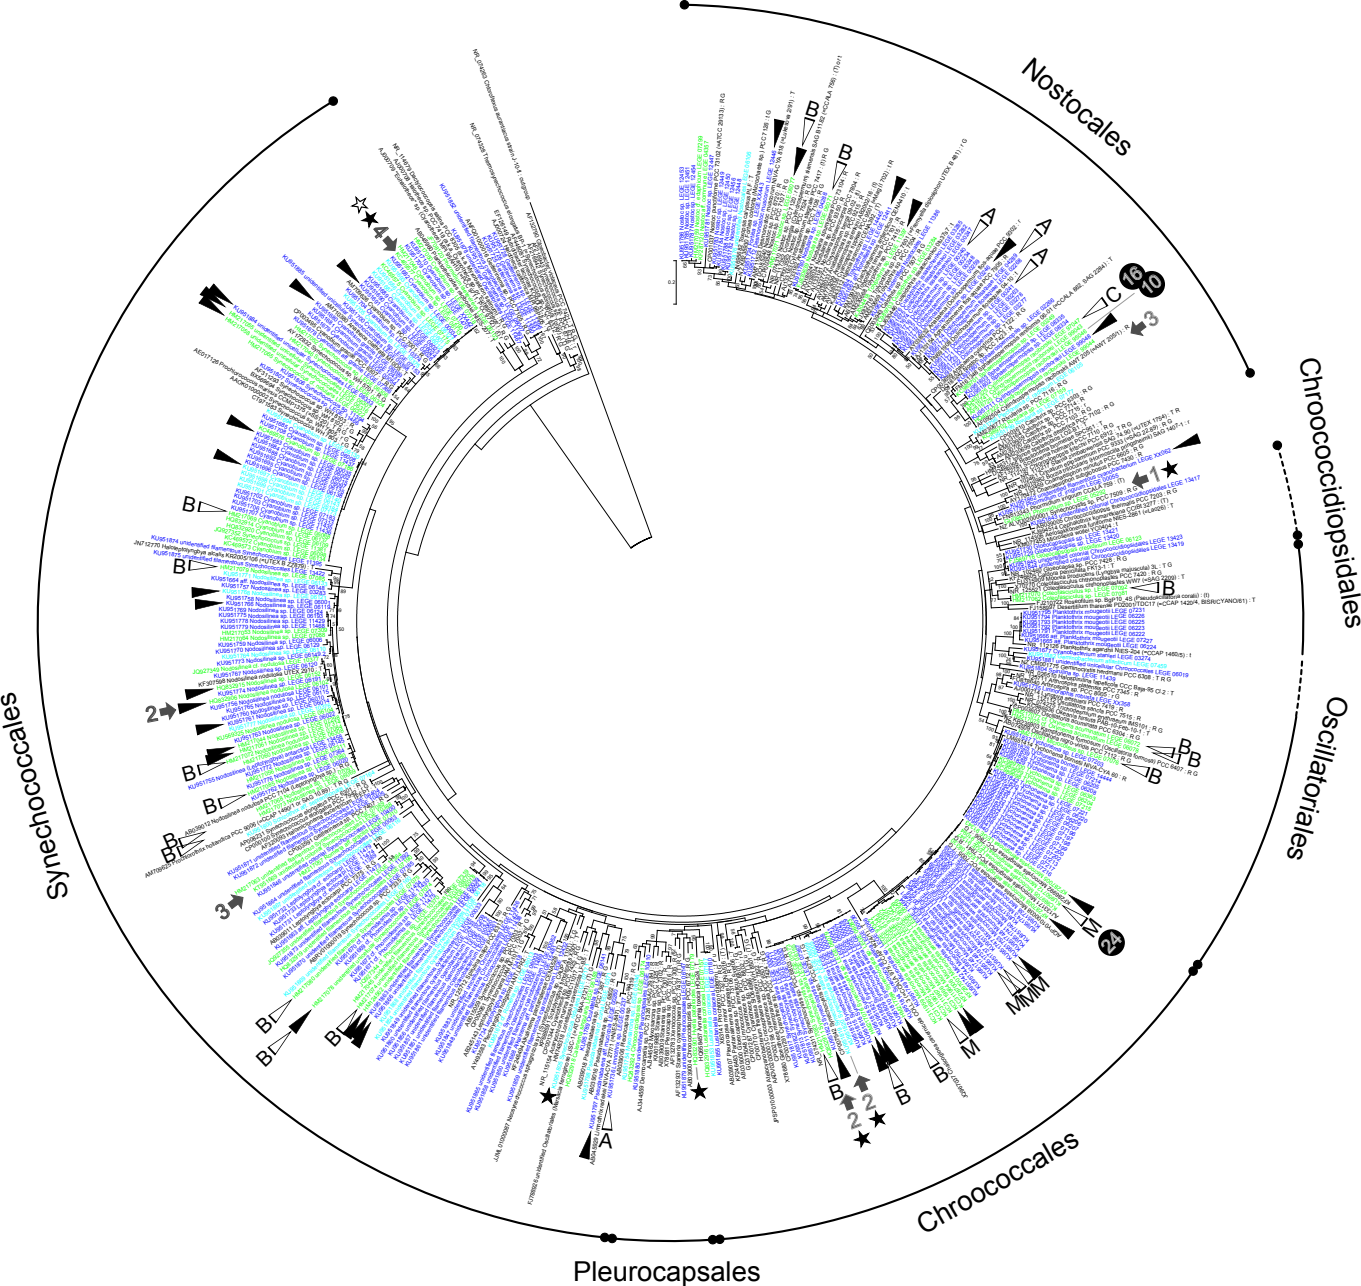

Supplement: 10811_2017_1369_MOESM1_ESM.pdf [file 10811_2017_1369_MOESM1_ESM.pdf]
